# Supplementary material for: Green synthesis of selenium nanoparticles mediated from Ceropegia bulbosa Roxb extract and its cytotoxicity, antimicrobial, mosquitocidal and photocatalytic activities
Source: PubMed Central journal article supplement (PMC7806947; doi:10.1038/s41598-020-80327-9), 2021-01-13
Supplement: 41598_2020_80327_MOESM1_ESM.pdf [file 41598_2020_80327_MOESM1_ESM.pdf]

**Green synthesis of selenium nanoparticles mediated from *Ceropegia bulbosa* Roxb extract and its cytotoxicity, antimicrobial, mosquitocidal and photocatalytic activities**

Vetrivel Cittrarasu<sup>1</sup>, Durairaj Kaliannan<sup>2,3,†</sup>, Dharman Kalaimurugan<sup>2</sup>, Viji Maluventhen<sup>4</sup>, Muruges Easwaran<sup>5</sup>, Wen Chao Liu<sup>6,\*</sup>, Balamuralikrishnan Balasubramanian<sup>7,†,\*</sup>, Maruthupandian Arumugam<sup>1,\*</sup>

<sup>1</sup>Ethnopharmacology and algal biotechnology division, Department of Botany, School of Life Sciences, Periyar University, Salem-636011, Tamil Nadu India.

<sup>2</sup>Department of Environmental science, School of Life Sciences, Periyar University, Salem-636011, Tamil Nadu, India.

<sup>3</sup>Zoonosis Research Center, Department of Infection Biology, School of medicine, Wonkwang University, Iksan-54538, South Korea.

<sup>4</sup>Department of Botany, Thiagarajar College, Madurai – 625 099, Tamil Nadu, India.

<sup>5</sup>Nutritional Improvement of Crops, International Centre for Genetic Engineering and Biotechnology, New Delhi 110067, India.

<sup>6</sup>Department of Animal Science, College of Agriculture, Guangdong Ocean University, Zhanjiang, Guangdong 524088, P. R. China.

<sup>7</sup>Department of Food science and Biotechnology, College of life sciences, Sejong University, Seoul-05006, South Korea.

†Equally contributed as first author

\*Corresponding authors: [maruthumdu82@gmail.com](mailto:maruthumdu82@gmail.com) (M.A); [geneticismurali@gmail.com](mailto:geneticismurali@gmail.com), [bala.m.k@sejong.ac.kr](mailto:bala.m.k@sejong.ac.kr) (B.B), [liuwc@gdou.edu.cn](mailto:liuwc@gdou.edu.cn) (W.L)

**Supplementary Table 1:** Raw data for cell viabilities of the MDA-MB-231 breast cancer cells and HBL-100 normal breast cells incubated with rapid synthesized SeNPs for 48 h.

| Concentration (µg/mL) | Cell viability % |        |                 |       |
|-----------------------|------------------|--------|-----------------|-------|
|                       | HBL - 100 cell   | SD     | MDA-MB 231 cell | SD    |
| 0                     | 99.33            | 0.3333 | 99.67           | 0.577 |
| 5                     | 98.00            | 0.3333 | 92.67           | 0.333 |
| 10                    | 95.00            | 0.5774 | 88.00           | 0.333 |
| 15                    | 89.67            | 0.6667 | 81.33           | 0.333 |
| 20                    | 86.33            | 0.5774 | 74.00           | 0.333 |
| 25                    | 80.67            | 0.3333 | 66.33           | 0.333 |
| 30                    | 77.33            | 0.3333 | 58.33           | 0.333 |
| 35                    | 71.67            | 0.3333 | 49.33           | 0.333 |
| 40                    | 64.67            | 0.3333 | 41.33           | 0.333 |
| 45                    | 58.33            | 0.5774 | 37.00           | 0.333 |
| 50                    | 53.67            | 0.5774 | 32.00           | 0.284 |

**Supplementary Table 2:** Raw data for the antibacterial activity of SeNPs on different *B. subtilis* and *E. coli*

| Concentration (µg/mL) | Zone of Inhibition (mm)  |        |                |        |
|-----------------------|--------------------------|--------|----------------|--------|
|                       | <i>Bacillus subtilis</i> | SD     | <i>E. coli</i> | SD     |
| Control               | 14                       | 0.5774 | 4.666666667    | 0.3333 |
| 25                    | 10                       | 0.5774 | 6              | 0.5774 |
| 50                    | 13.666666667             | 0.3333 | 10.33333333    | 0.3333 |
| 75                    | 16                       | 0.5774 | 12.666666667   | 0.3333 |
| 100                   | 16.666666667             | 0.3333 | 15.33333333    | 0.3333 |

**Supplementary Table 3:** Raw data of photocatalytic degradation of methylene blue in the presence SeNPs.

| <b>Time</b> | <b>Without catalyst</b> | <b>With catalyst</b> |
|-------------|-------------------------|----------------------|
| 0           | 100                     | 100                  |
| 10          | 99                      | 32.5                 |
| 20          | 98.7                    | 26                   |
| 30          | 98                      | 22.5                 |
| 40          | 97                      | 14                   |
| 50          | 97.5                    | 11                   |
| 60          | 96.34                   | 7.5                  |
| 70          | 96.5                    | 6.5                  |
| 80          | 96                      | 4                    |

**Figure S1:** Average particle size distribution by Image J analysis.

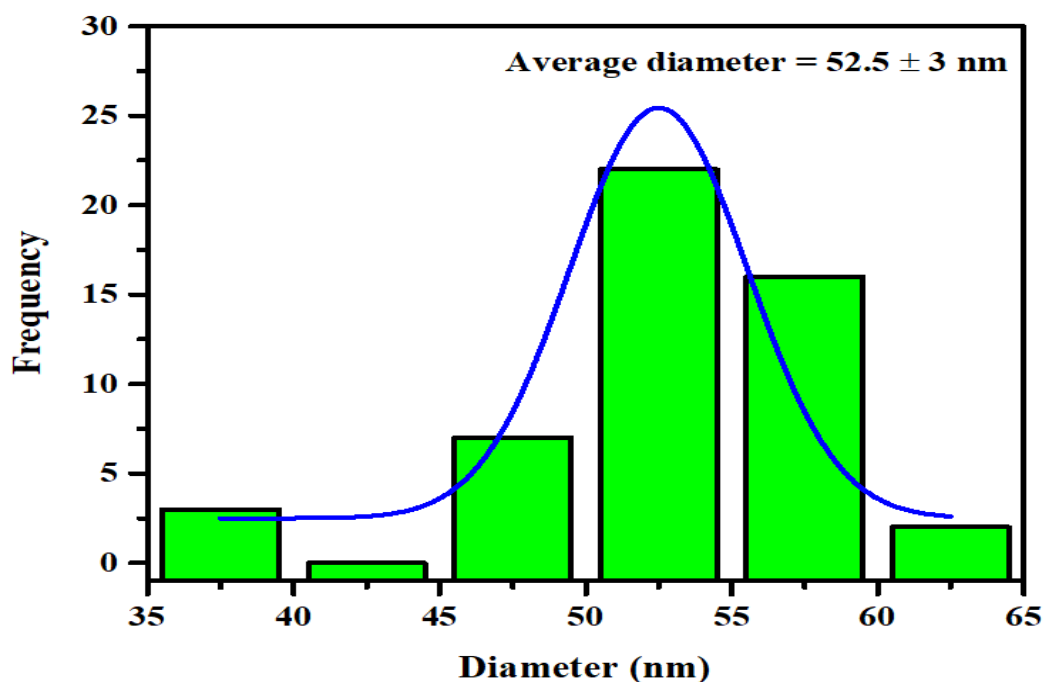

**Supplementary Table 4:** Histogram raw data for average particle size analysis.

| Bins        |        |                |                        |
|-------------|--------|----------------|------------------------|
| Bin Centers | Counts | Cumulative Sum | Cumulative Probability |
| 65          | 0      | 0              | 0                      |
| 75          | 3      | 3              | 6                      |
| 85          | 1      | 4              | 8                      |
| 95          | 7      | 11             | 22                     |
| 105         | 22     | 33             | 66                     |
| 115         | 15     | 48             | 96                     |
| 125         | 2      | 50             | 100                    |
